# Supplementary material
Source: MDPI journal article supplement (https://www.mdpi.com/2311-5629/10/1/12)
Supplement: s1 [file s1]

## Supporting Information

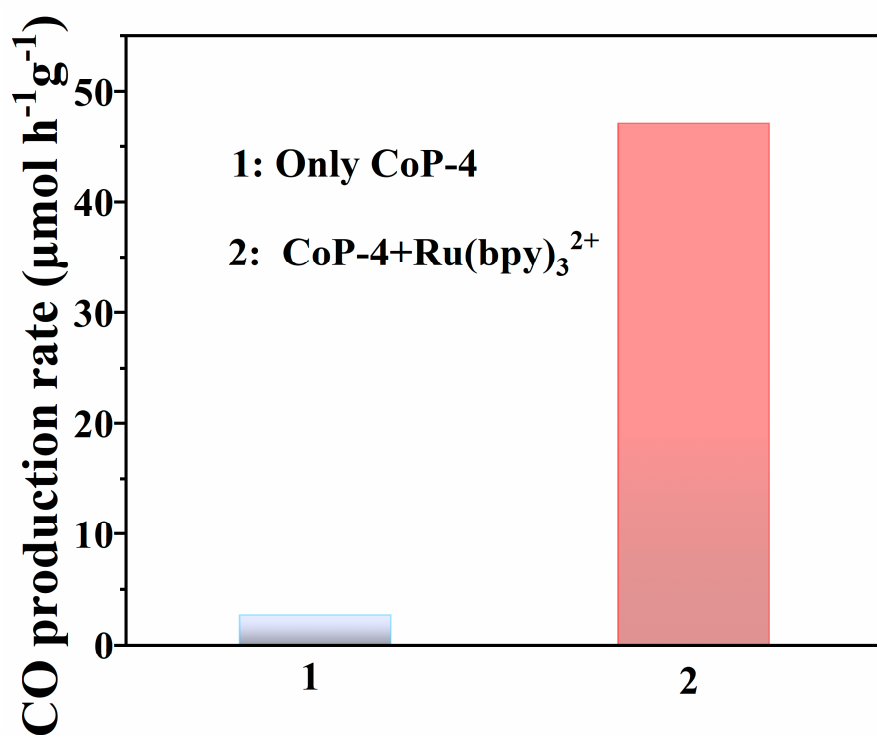

**Figure S1.** Photocatalytic CO<sub>2</sub> performance under different conditions.
